# Supplementary material for: Design, Synthesis and Antifungal Activity of Stapled Aurein1.2 Peptides
Source: MDPI journal article supplement (doi:10.3390/antibiotics10080956), 2021-08-09
Supplement: s1 [file s1]

## Supplementary Material

**Table S1. Electrospray MS data for peptides (positive mode)**

| Peptide   | Molecular Weight (g/mol) | Found Mass                      |
|-----------|--------------------------|---------------------------------|
| Aurein1.2 | 1520.86                  | [M+H] <sup>+</sup> = 1521.8632; |
| Sau-1     | 1600.96                  | [M+H] <sup>+</sup> = 1601.9678; |
| Sau-2     | 1544.86                  | [M+H] <sup>+</sup> = 1545.8645; |
| Sau-3     | 1495.87                  | [M+H] <sup>+</sup> = 1496.8702; |
| Sau-4     | 1527.90                  | [M+H] <sup>+</sup> = 1528.9080; |
| Sau-5     | 1544.86                  | [M+H] <sup>+</sup> = 1545.8657; |
| Sau-6     | 1586.91                  | [M+H] <sup>+</sup> = 1587.9116; |
| Sau-7     | 1513.89                  | [M+H] <sup>+</sup> = 1514.8955; |
| Sau-8     | 1555.90                  | [M+H] <sup>+</sup> = 1556.9061; |
| Sau-9     | 1510.88                  | [M+H] <sup>+</sup> = 1511.8856; |

**Spectrum**

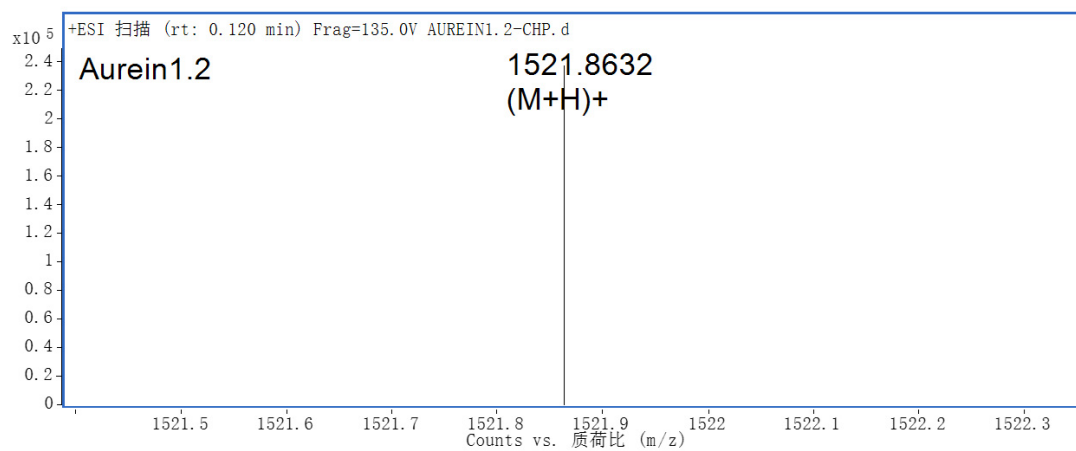

**Figure S1.** HR-MS for compound **Aurein1.2**

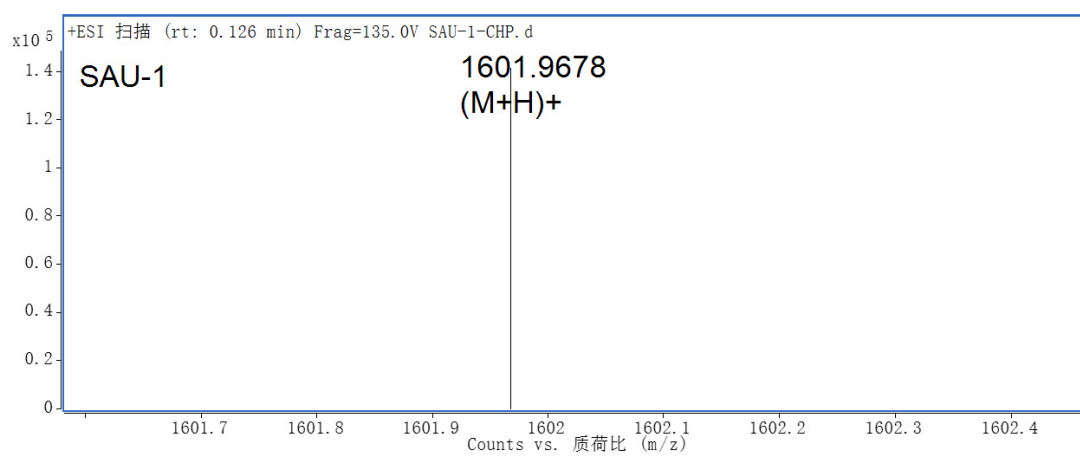

**Figure S2.** HR-MS for compound **SAU-1**

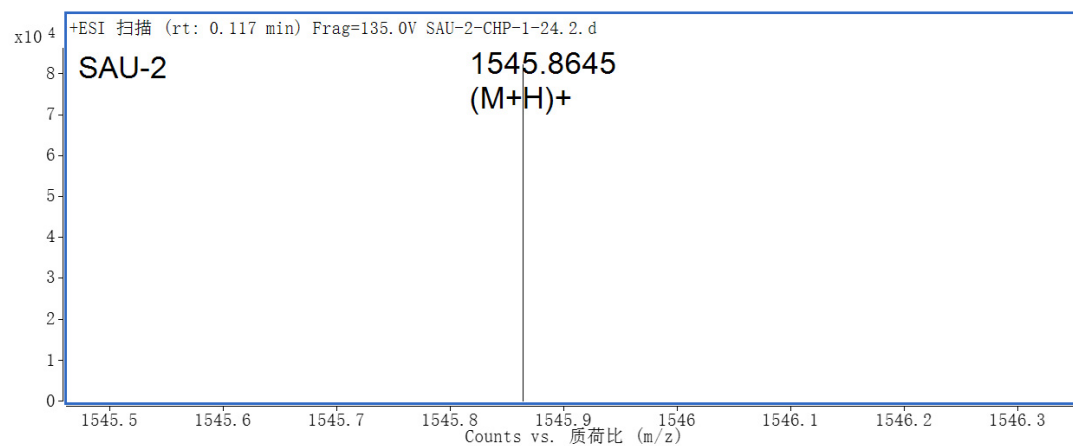

**Figure S3.** HR-MS for compound **SAU-2**

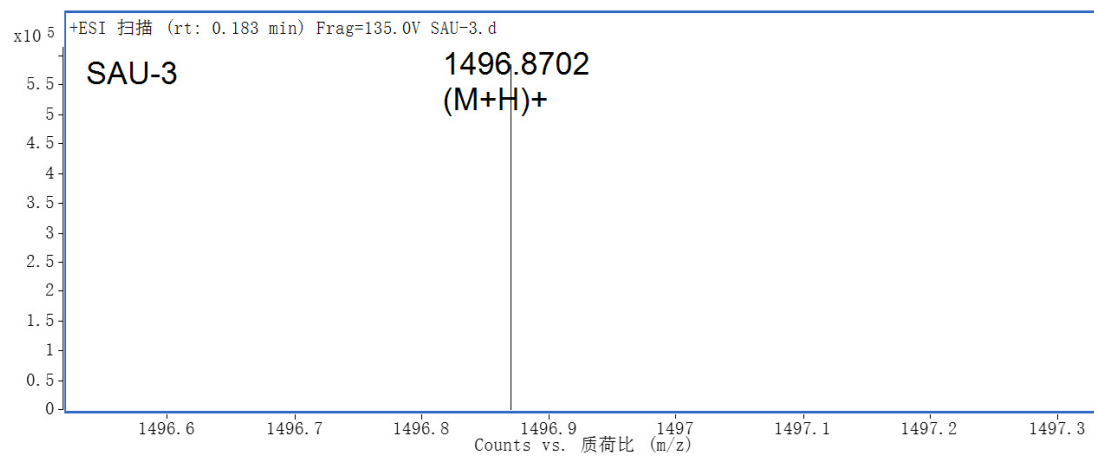

**Figure S4.** HR-MS for compound **SAU-3**

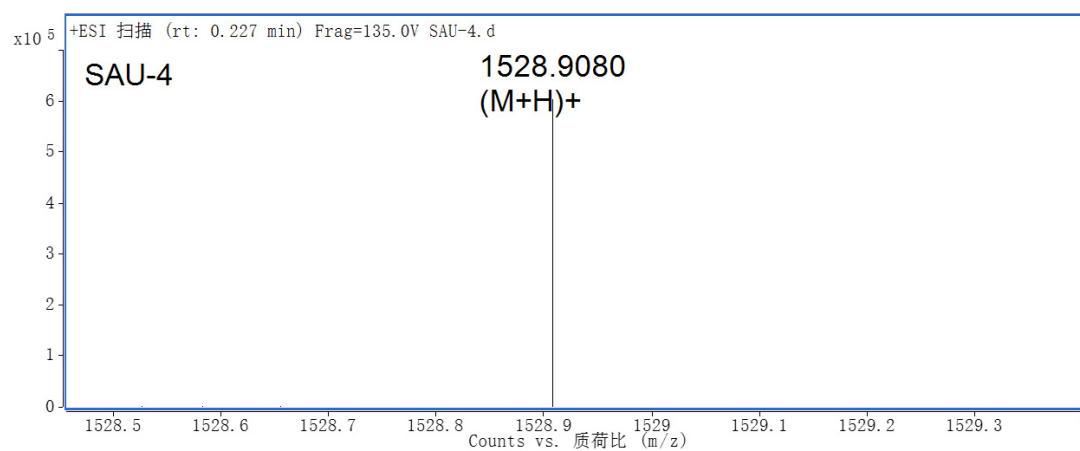

**Figure S5.** HR-MS for compound **SAU-4**

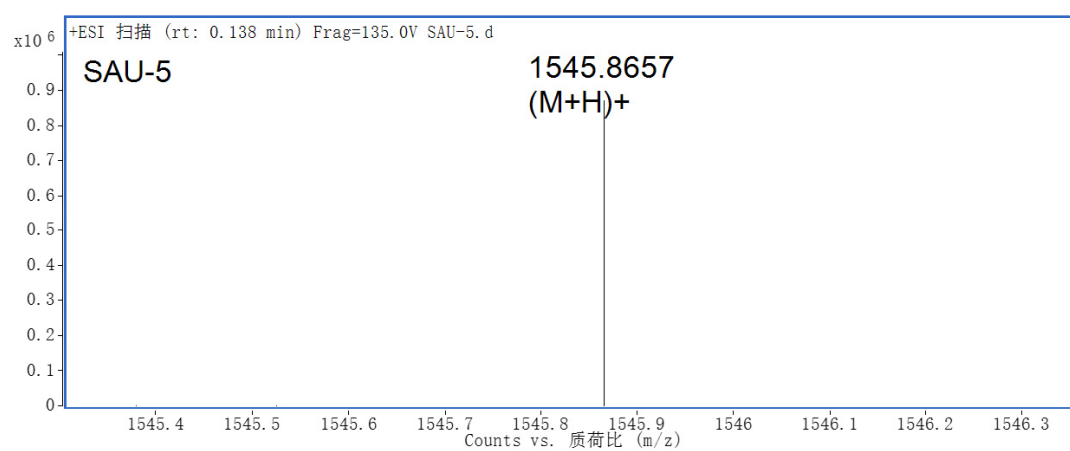

**Figure S6.** HR-MS for compound **SAU-5**

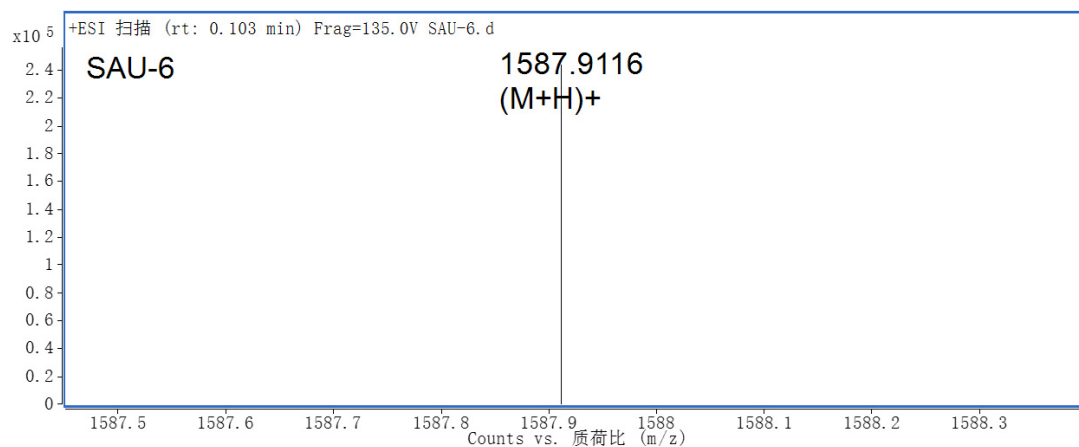

**Figure S7.** HR-MS for compound **SAU-6**

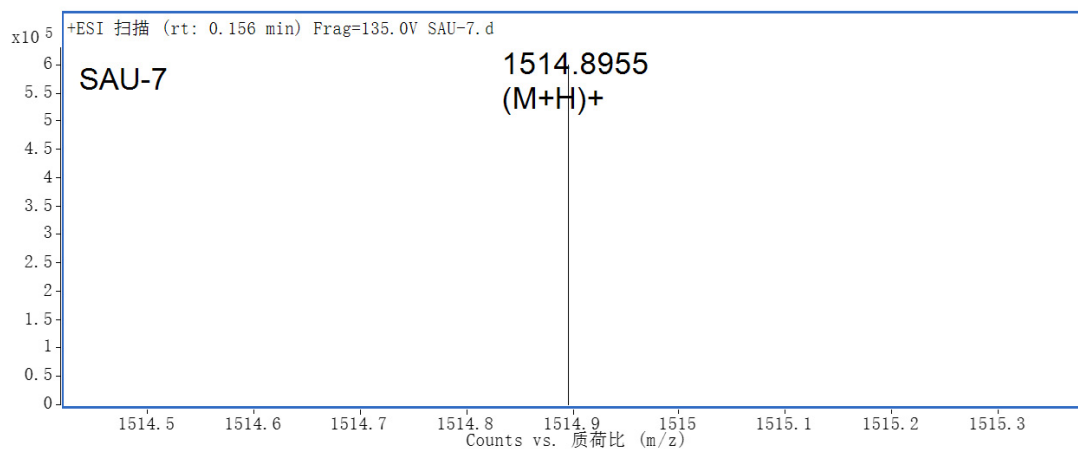

**Figure S8.** HR-MS for compound **SAU-7**

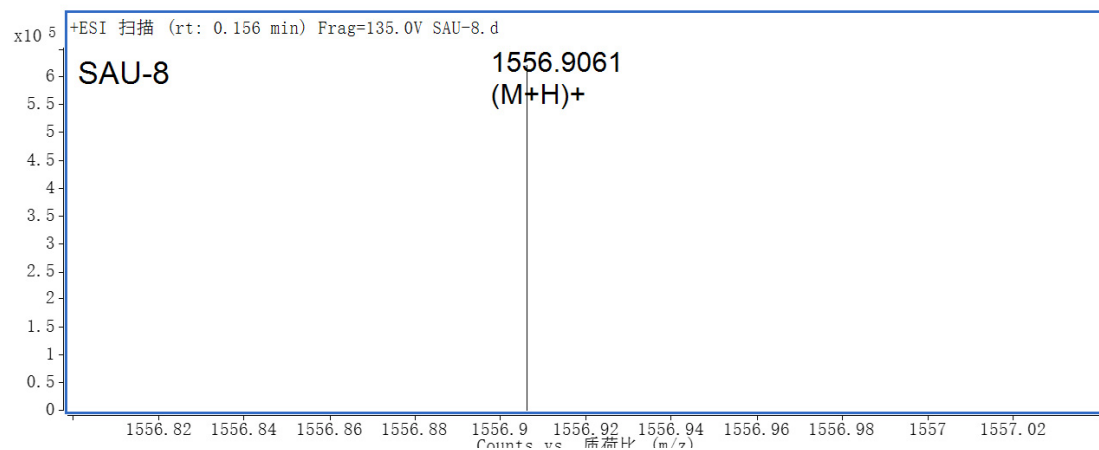

**Figure S9.** HR-MS for compound **SAU-8**

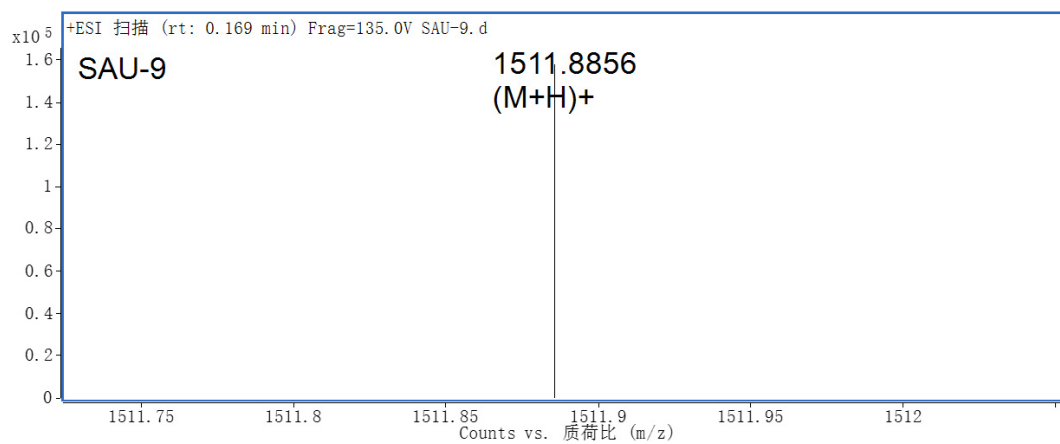

**Figure S10.** HR-MS for compound **SAU-9**

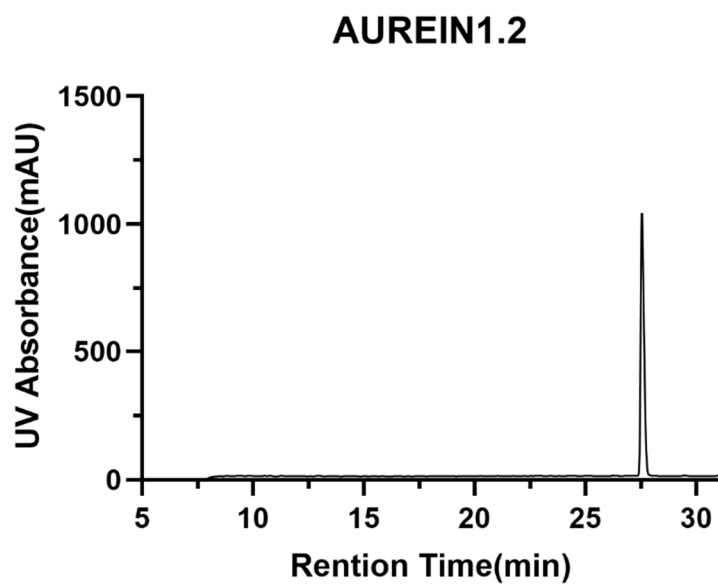

Figure S11. Analytical HPLC trace for compound **Aurein1.2**

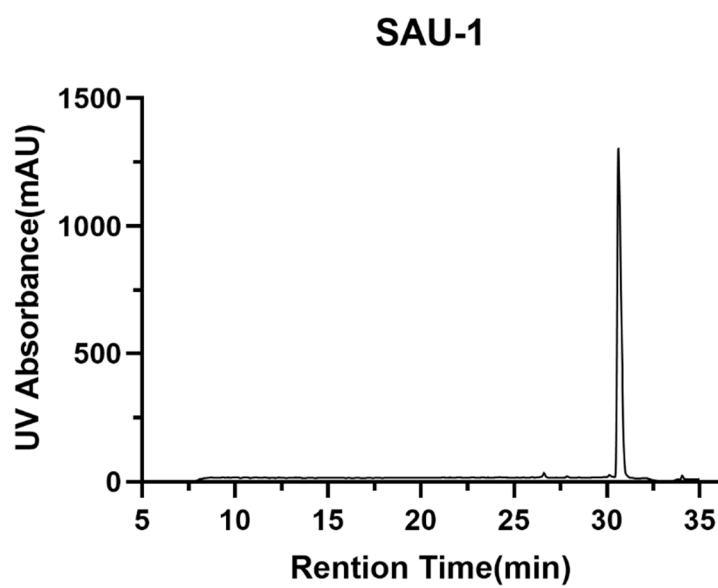

Figure S12. Analytical HPLC trace for compound **SAU-1**

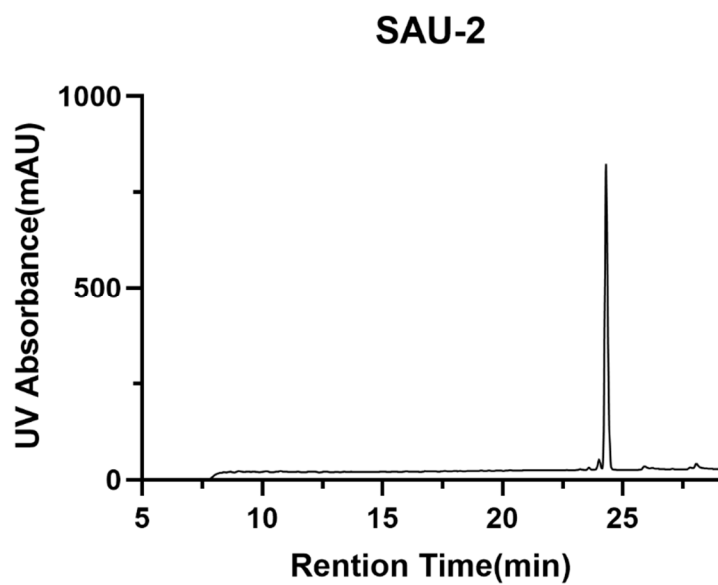

Figure S13. Analytical HPLC trace for compound SAU-2

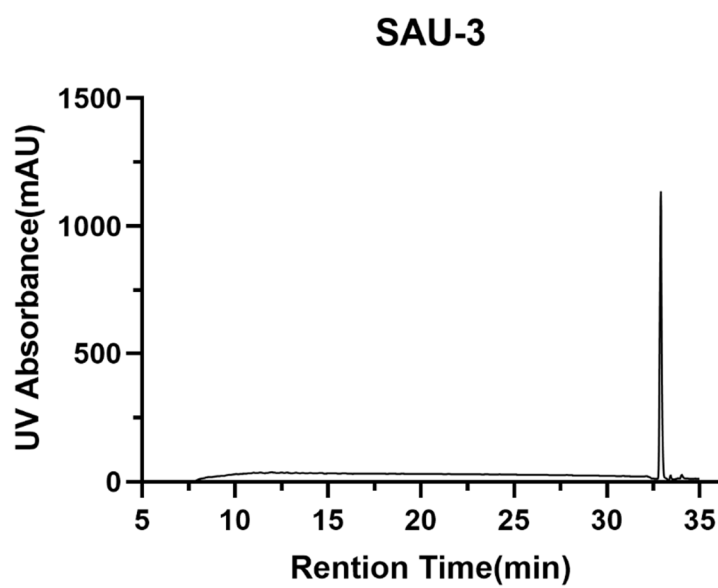

Figure S14. Analytical HPLC trace for compound SAU-3



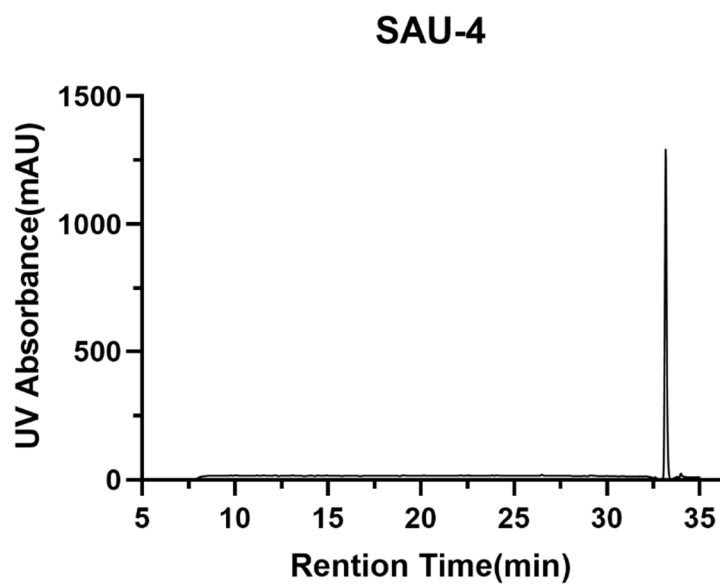

Figure S15. Analytical HPLC trace for compound SAU-4

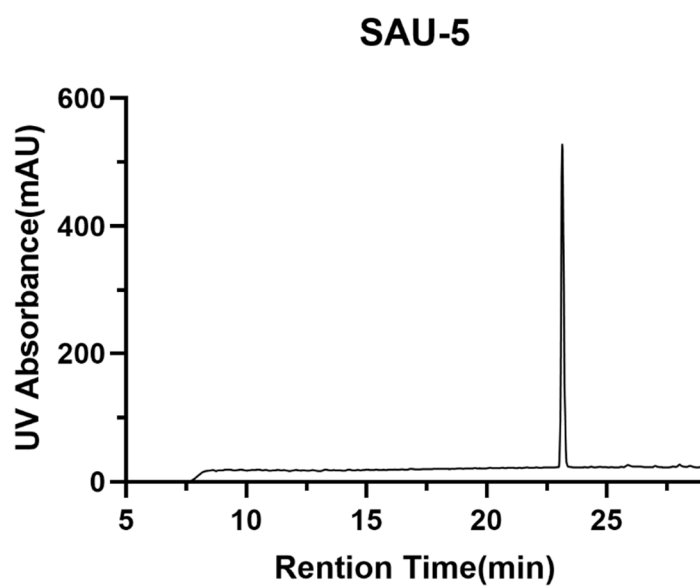

Figure S16. Analytical HPLC trace for compound SAU-5

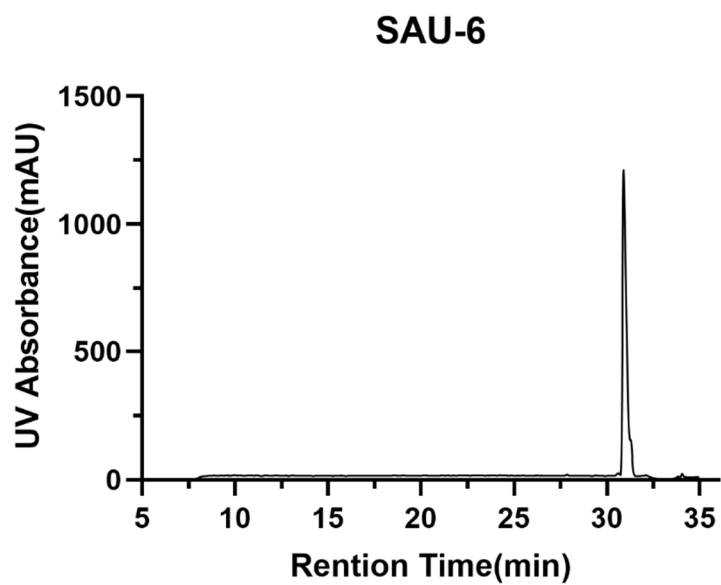

Figure S17. Analytical HPLC trace for compound SAU-6

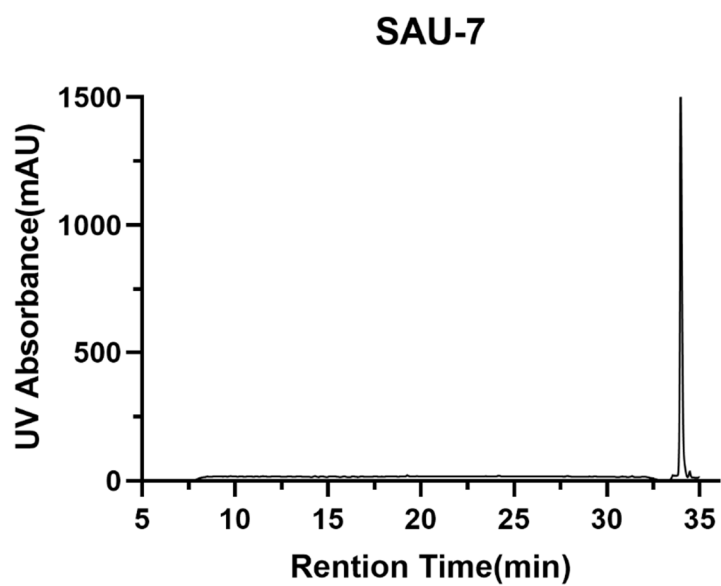

Figure S18. Analytical HPLC trace for compound SAU-7

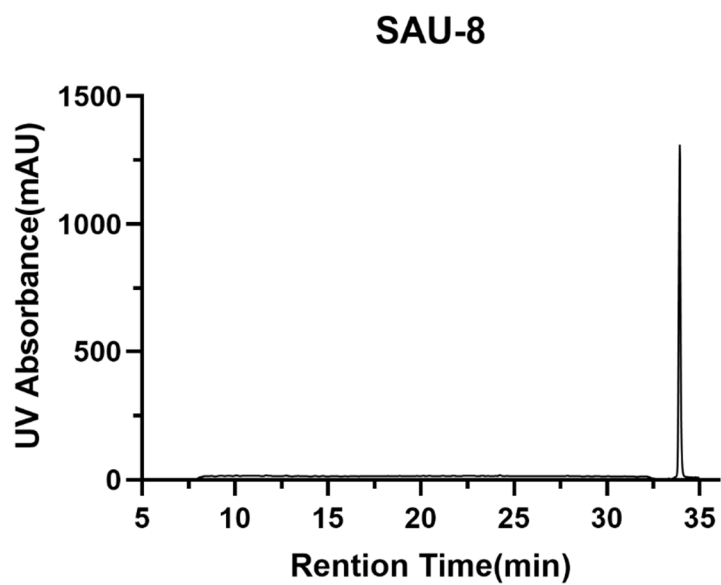

Figure S19. Analytical HPLC trace for compound SAU-8

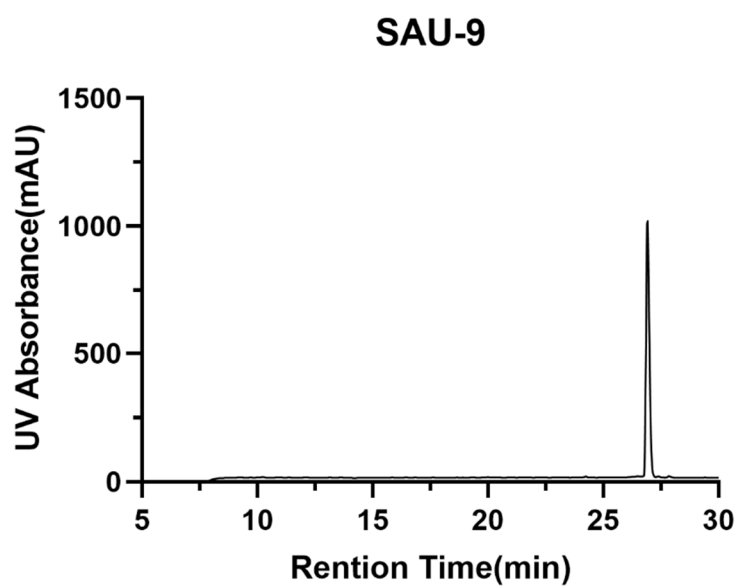

Figure S20. Analytical HPLC trace for compound SAU-9

### AUREIN1.2

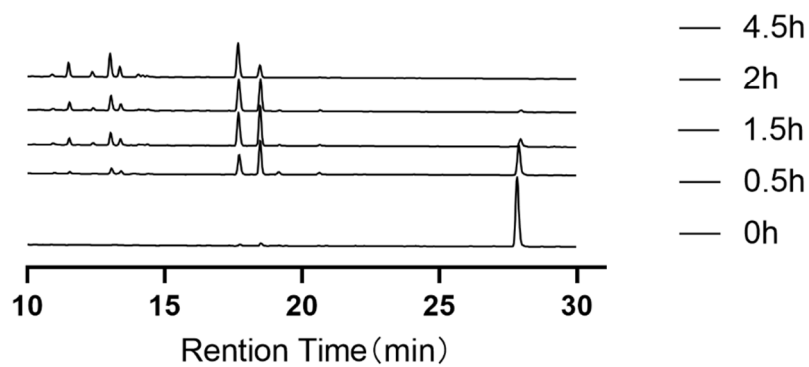

**Figure S21.** Analytical HPLC trace for Residual content of compound Aurein1.2

### SAU-1

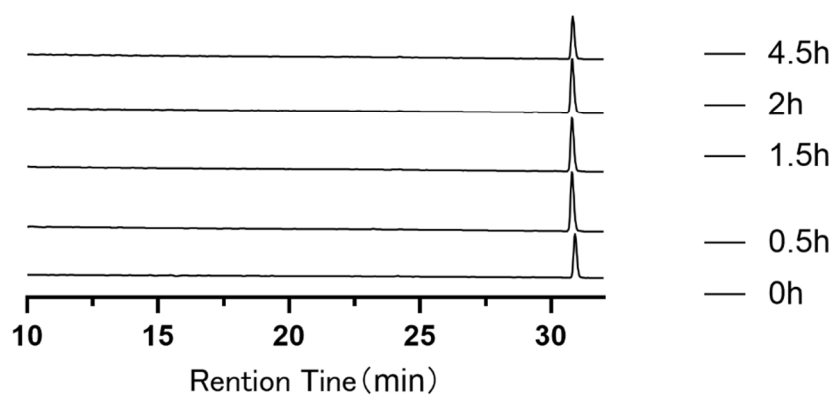

**Figure S22.** Analytical HPLC trace for Residual content of compound SAU-1

### SAU-2

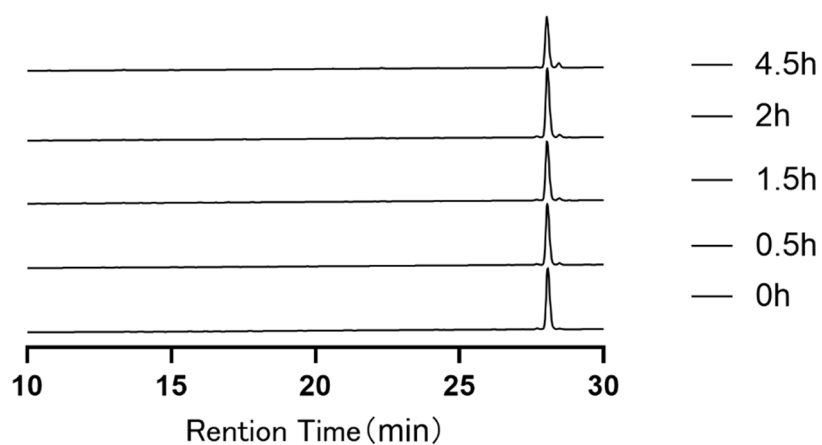

**Figure S22.** Analytical HPLC trace for Residual content of compound SAU-2

### SAU-5

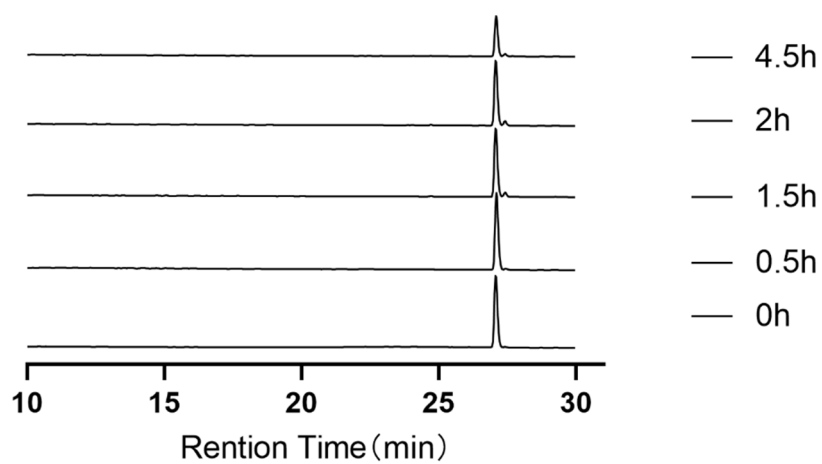

**Figure S23.** Analytical HPLC trace for Residual content of compound SAU-5

### SAU-9

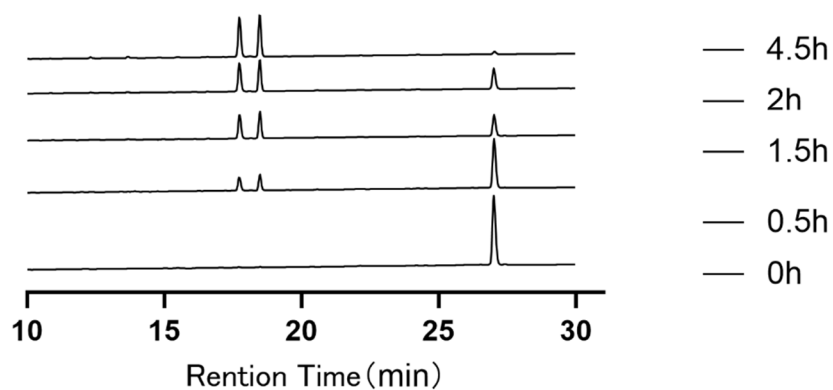

**Figure S24.** Analytical HPLC trace for Residual content of compound SAU-9

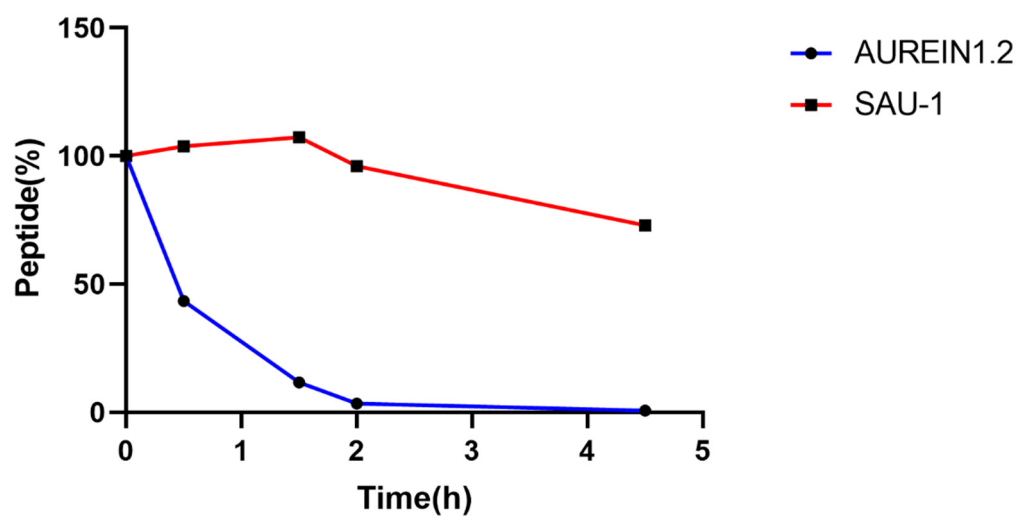

**Figure S25.** The hydrolytic stability of Aurein1.2 and SAU -1 was determined by high performance liquid chromatography

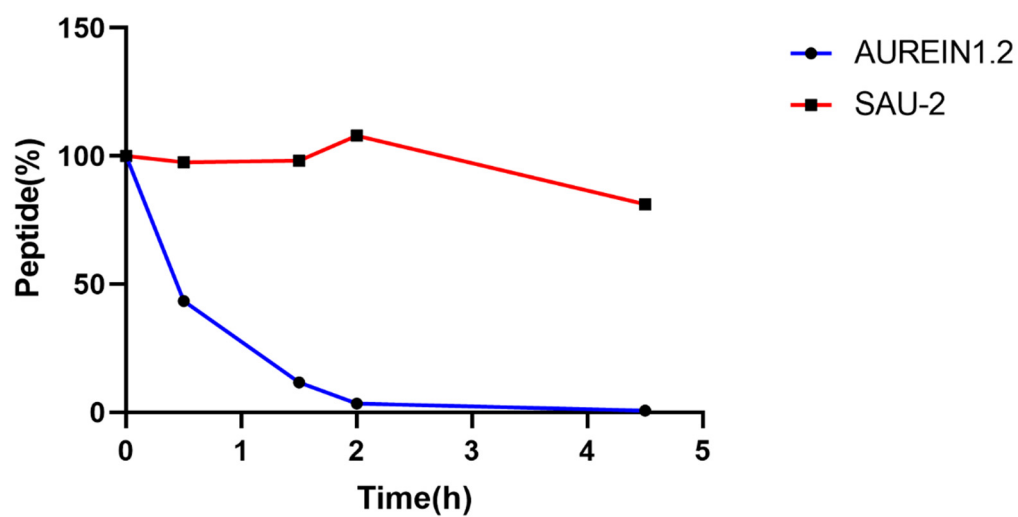

Figure S26. The hydrolytic stability of Aurein1.2 and SAU -2 was determined by high performance liquid chromatography

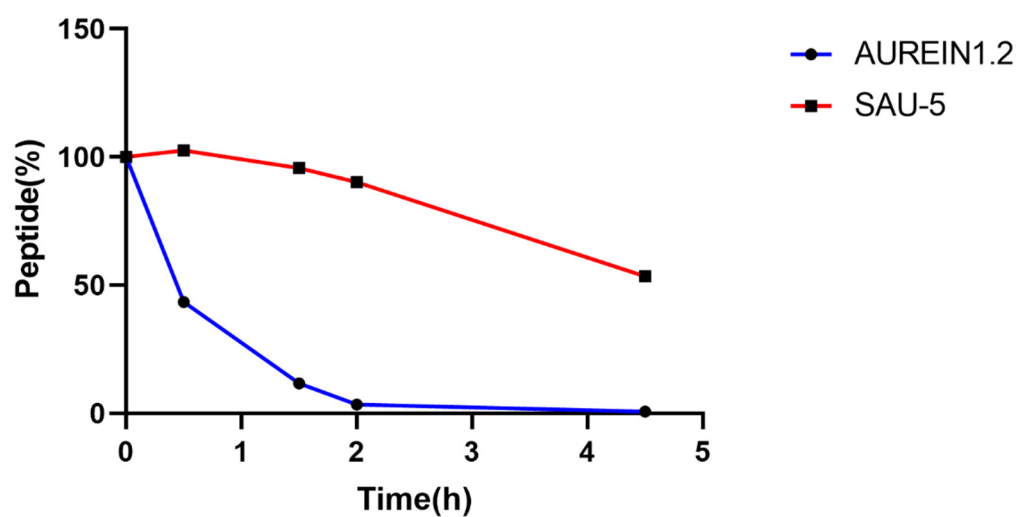

Figure S27. The hydrolytic stability of Aurein1.2 and SAU -5 was determined by high performance liquid chromatography

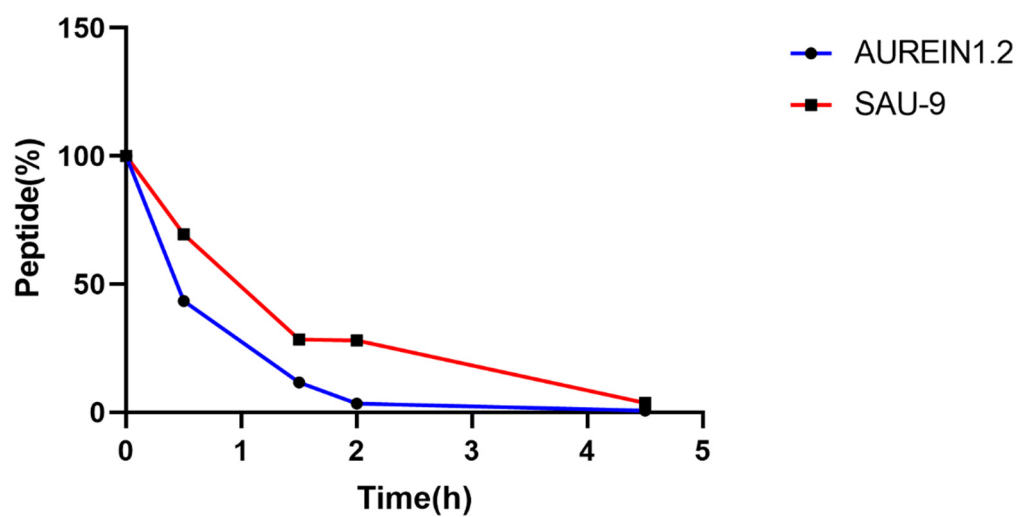

**Figure S28.** The hydrolytic stability of Aurein1.2 and SAU -9 was determined by high performance liquid chromatography
